# Supplementary material for: Efficient In Vivo Screening Method for the Identification of C4 Photosynthesis Inhibitors Based on Cell Suspensions of the Single-Cell C4 Plant Bienertia sinuspersici
Source: PubMed Central journal article supplement (PMC6831552; doi:10.3389/fpls.2019.01350), 2019-10-30
Supplement: DataSheet_1.pdf [file DataSheet_1.pdf]

# Supplementary Material:

## Efficient *in vivo* screening method for the identification of C<sub>4</sub> photosynthesis inhibitors based on cell suspensions of the single-cell C<sub>4</sub> plant *Bienertia sinuspersici*

### 1 SUPPLEMENTARY DATA

Sequences used for the alignments are (UniProt identifiers if not stated otherwise): Bs (*Bienertia sinuspersici*, PEPC: GenBank ABG20459.1, PPKD: GenBank GCEP01054245.1/GCEP01053558.1), Ft (*Flaveria trinervia*, PEPC: P30694, PPKD: P22221), So (*Saccharum officinarum*, PEPC: Q9FS96, PPKD: Q9SNY6), Sb (*Sorghum bicolor*, PEPC: P15804, PPKD: Q84N32), Zm (*Zea mays*, PEPC: P04711, PPKD: P11155), Ah (*Amaranthus hypochondriacus*, PEPC: E2JE39, PPKD: F8UU33), Ec (*Echinochloa crus-galli*, PEPC: Q52NW0, PPKD: Q4JIY1), Si (*Setaria italica*, PEPC: Q8S2Z8, PPKD: A0A290Y0Z5).

#### 1.1 Multiple Sequence Alignment of PEPC

|    |    |          |      |         |      |           |          |        |       |      |
|----|----|----------|------|---------|------|-----------|----------|--------|-------|------|
|    |    | 10       | 20   | 30      | 40   |           |          |        |       |      |
| Ah | MA | ----SGKL | EKMA | SIDAQLR | LLAP | PKVSEDDKL | VEYDALL  | LD     | DRFLD | ILE  |
| Bs | MA | ----SGKL | EKMA | SIDAQLR | ALAP | PKVSEDDKL | VEYDALL  | LD     | DRFLD | SVQ  |
| Ft | MA | ----NRNV | EKLA | SIDAQLR | LLVP | PKVSEDDKL | VEYDALL  | LD     | DKFLD | IILQ |
| Ec | MA | -----S   | ERHQ | SIDAQLR | LLAP | PKVSEDDKL | VEYDALL  | LD     | DRFLD | IILQ |
| Sb | MA | -----S   | ERHH | SIDAQLR | ALAP | PKVSE     | EE--LIQ  | YDALLV | DRFLD | IILQ |
| Si | MA | ----SKPV | EKHH | SIDAQLR | LLAP | PKVSEDDKL | VEYDALL  | LD     | DRFLD | IFQ  |
| So | MA | -----S   | ERHH | SIDAQLR | ALAP | PKVSE     | EE--LIQ  | YDALLV | DRFLD | IILQ |
| Zm | MA | STKAPGPG | EKHH | SIDAQLR | QLVP | PKVSEDDKL | IEYDALLV | DRFL   | NILQ  |      |

  

|    |        |       |         |         |     |       |        |        |        |        |       |
|----|--------|-------|---------|---------|-----|-------|--------|--------|--------|--------|-------|
|    | 50     | 60    | 70      | 80      | 90  |       |        |        |        |        |       |
| Ah | SLHGS  | GIRET | VQELYE  | HAAEYER | THD | TKKLE | EELGNL | ITSL   | DAGDS  | IIVIAK |       |
| Bs | ALHGEE | IRET  | VQGLYE  | HAAEYER | TRD | TKKLE | EELGDM | LIRL   | DAGDS  | IIVIAK |       |
| Ft | DLHGED | LKEAV | QOCYELS | AEYEGKH | DPK | KKLE  | EELGSL | LTSL   | LDTGDS | IIVIAK |       |
| Ec | DLHGPN | LREFV | QECYELS | AEYDRDH | ASK | LS    | ELGSKL | TGLA   | PADA   | ILVAS  |       |
| Sb | DLHGPS | LREFV | QECYEV  | SADYEGK | KD  | TS    | KL     | GELGAK | LTGLA  | PADA   | ILVAS |
| Si | DLHGPN | IREFV | QECYEV  | AAEYER  | DRD | AAK   | LS     | ELGSRL | TKL    | SPNDA  | IIVAS |
| So | DLHGPN | LREFV | QECYEV  | SADYEGK | KD  | TS    | KL     | GELGAK | LTGLA  | PADA   | ILVAS |
| Zm | DLHGPN | LREFV | QECYEV  | SADYEGK | GD  | TT    | KL     | GELGAK | LTGLA  | PADA   | ILVAS |

  

|    |     |          |          |       |       |        |         |        |        |      |      |      |
|----|-----|----------|----------|-------|-------|--------|---------|--------|--------|------|------|------|
|    | 100 | 110      | 120      | 130   | 140   |        |         |        |        |      |      |      |
| Ah | SFS | QMLNLANL | AEEVQLAY | RRRIK | KTKK  | GDFADE | SSAI    | TESD   | FEET   | LRRL |      |      |
| Bs | SFS | HMLILANL | AEEVQIAY | RRRIK | NLKK  | GDFADE | SSAI    | TESD   | LEET   | LRRL |      |      |
| Ft | AFS | HMLNLANL | AEEVQIAY | RRRI  | -KLKS | GDFADE | ANAT    | TESD   | IEET   | FKRL |      |      |
| Ec | SFS | HMLNLANL | AEEVQIAQ | RRRN  | -KLKR | GDF    | TDEGSAL | TESD   | IEET   | LKRL |      |      |
| Sb | SIL | HMLNLANL | AEEVQLAH | RRRN  | S     | KLKH   | GDFS    | DEGSAT | TESD   | IEET | LKRL |      |
| Si | SFS | NMLNLANL | AEEVQLAH | LRRN  | -KLKR | GDF    | FADE    | GF     | AATESD | IEET | LKRL |      |
| So | SIL | HMLNLANL | AEEVQLAH | RRRN  | S     | KLKH   | GDFS    | DEGSAT | TESD   | IEET | LKRL |      |
| Zm | SIL | HMLNLANL | AEEVQIAH | RRRN  | S     | KLK    | KG      | FADE   | GSAT   | TESD | IEET | LKRL |

|    |         |         |      |        |        |          |          |         |       |       |      |      |     |    |
|----|---------|---------|------|--------|--------|----------|----------|---------|-------|-------|------|------|-----|----|
|    | 150     | 160     | 170  | 180    | 190    |          |          |         |       |       |      |      |     |    |
| Ah | V-DL    | KESPEE  | IFAT | LKNQ   | TVDLV  | LTAHPTQS | VRRS     | LLOKH   | HGR   | RIRD  | CL   | SQ   | L   |    |
| Bs | VVDL    | KKESPEE | IFET | LKNQ   | TVELV  | LTAHPTQS | VRRS     | LLOKH   | HGR   | RIRD  | CL   | TQ   | L   |    |
| Ft | VHKL    | NKSPEE  | VFD  | DALKNQ | TVELV  | LTAHPTQS | VRRS     | LLOKH   | HGR   | RIRN  | CL   | AQ   | L   |    |
| Ec | VTDL    | GKTK    | KEE  | VFD    | DALKNQ | TVELV    | MTAHPTQS | VRRS    | LLOKH | YS    | RIRN | CL   | TEL |    |
| Sb | VS-LGKT | PAE     | VFE  | ALKNQ  | SVDLV  | F        | TAHPTQS  | A       | RRS   | LLOKH | NA   | RIRN | CL  | TQ |
| Si | VTEL    | GKS     | KEE  | VFD    | DALKNQ | TVDLV    | F        | TAHPTQS | VRRS  | LLOKH | HA   | RIRN | CL  | TQ |
| So | VS-LGKT | PEE     | VFE  | ALKNQ  | SVDLV  | F        | TAHPTQS  | A       | RRS   | LLOKH | NA   | RIRN | CL  | TQ |
| Zm | VSEV    | GKSPEE  | VFE  | ALKNQ  | TVDLV  | F        | TAHPTQS  | A       | RRS   | LLOKH | NA   | RIRN | CL  | TQ |

|    |      |     |     |     |         |         |         |         |         |      |      |      |    |      |     |     |     |    |     |   |   |   |   |   |   |   |   |   |
|----|------|-----|-----|-----|---------|---------|---------|---------|---------|------|------|------|----|------|-----|-----|-----|----|-----|---|---|---|---|---|---|---|---|---|
|    | 200  | 210 | 220 | 230 | 240     |         |         |         |         |      |      |      |    |      |     |     |     |    |     |   |   |   |   |   |   |   |   |   |
| Ah | YAKD | I   | TP  | DDK | QELDEAL | QRE     | IQA     | AFRT    | DE      | IRR  | V    | O    | PT | PQ   | DEM | R   | M   | G  | M   | S | Y | F | H | E |   |   |   |   |
| Bs | YAKD | I   | TP  | DDK | QELDEAL | QRE     | IQA     | AFRT    | DE      | IRR  | M    | O    | PT | PQ   | DEM | R   | A   | G  | M   | S | Y | F | H | E |   |   |   |   |
| Ft | YAKD | I   | TP  | DDK | QELDEAL | H       | RE      | IQA     | AFRT    | DE   | IRR  | T    | P  | P    | T   | PQ  | DEM | R  | A   | G | M | S | Y | F | H | E |   |   |
| Ec | YAKD | I   | S   | A   | DDK     | KELDEAL | QRE     | IQA     | AFRT    | DE   | IRRA | Q    | P  | T    | PQ  | DEM | R   | Y  | G   | M | S | Y | F | H | E |   |   |   |
| Sb | SAKD | V   | T   | V   | E       | D       | K       | KELDEAL | H       | RE   | IQA  | AFRT | DE | IRRA | Q   | P   | T   | PQ | DEM | R | Y | G | M | S | Y | I | H | E |
| Si | YAKD | N   | T   | E   | DDK     | QELDEAL | QRE     | IQA     | C       | FRT  | DE   | IRRA | Q  | P    | T   | PQ  | DEM | R  | Y   | G | M | S | Y | F | H | E |   |   |
| So | ST   | KD  | V   | T   | V       | E       | D       | K       | KELDEAL | QRE  | IQA  | AFRT | DE | IRRA | Q   | P   | T   | PQ | DEM | R | Y | G | M | S | Y | I | H | E |
| Zm | NA   | KD  | I   | T   | D       | DDK     | QELDEAL | QRE     | IQA     | AFRT | DE   | IRRA | Q  | P    | T   | PQ  | A   | E  | M   | R | Y | G | M | S | Y | I | H | E |

|    |     |     |     |     |     |   |   |   |   |   |   |   |   |   |   |   |   |   |   |   |   |   |   |   |   |   |   |   |   |   |   |   |   |   |   |   |   |   |   |   |   |   |   |   |   |   |   |   |   |   |   |
|----|-----|-----|-----|-----|-----|---|---|---|---|---|---|---|---|---|---|---|---|---|---|---|---|---|---|---|---|---|---|---|---|---|---|---|---|---|---|---|---|---|---|---|---|---|---|---|---|---|---|---|---|---|---|
|    | 250 | 260 | 270 | 280 | 290 |   |   |   |   |   |   |   |   |   |   |   |   |   |   |   |   |   |   |   |   |   |   |   |   |   |   |   |   |   |   |   |   |   |   |   |   |   |   |   |   |   |   |   |   |   |   |
| Ah | T   | I   | W   | K   | G   | V | P | K | F | L | R | R | V | D | T | A | L | K | N | I | G | I | N | E | R | V | P | Y | N | V | P | L | I | Q | F | S | S | W | M | G | G | D | R | D | G | N | P | R | V | T |   |
| Bs | T   | I   | W   | K   | G   | V | P | K | F | L | R | R | L | D | T | A | L | K | N | I | G | I | N | E | R | V | P | Y | N | A | P | L | I | Q | F | S | S | S | W | M | G | G | D | R | D | G | N | P | R | V | T |
| Ft | T   | I   | W   | K   | G   | V | P | K | F | L | R | R | V | D | T | A | L | K | N | I | G | I | N | E | R | F | P | Y | N | A | P | L | I | Q | F | S | S | W | M | G | G | D | R | D | G | N | P | R | V | T |   |
| Ec | T   | I   | W   | K   | G   | V | P | K | F | L | R | R | V | D | T | A | L | K | N | I | G | I | N | E | R | L | P | Y | N | V | P | L | I | K | F | S | S | W | M | G | G | D | R | D | G | N | P | R | V | T |   |
| Sb | T   | V   | W   | N   | G   | V | P | K | F | L | R | R | V | D | T | A | L | K | N | I | G | I | N | E | R | L | P | Y | D | V | P | L | I | K | F | C | S | W | M | G | G | D | R | D | G | N | P | R | V | T |   |
| Si | T   | I   | W   | K   | G   | V | P | K | F | L | R | R | V | D | T | A | L | K | N | I | G | I | N | E | R | L | P | Y | N | A | P | L | I | Q | F | S | S | W | M | G | G | D | R | D | G | N | P | R | V | T |   |
| So | T   | V   | W   | K   | G   | V | P | K | F | L | R | R | V | D | T | A | L | K | N | I | G | I | N | O | R | L | P | Y | N | V | P | L | I | K | F | C | S | W | M | G | G | D | R | D | G | N | P | R | V | T |   |
| Zm | T   | V   | W   | K   | G   | V | P | K | F | L | R | R | V | D | T | A | L | K | N | I | G | I | N | E | R | L | P | Y | N | V | S | L | I | R | F | S | S | W | M | G | G | D | R | D | G | N | P | R | V | T |   |

|    |       |     |     |     |     |   |   |   |   |   |   |   |   |   |   |   |   |   |   |   |   |   |   |   |   |   |   |   |   |   |   |   |   |   |   |   |   |   |   |   |   |   |   |   |   |
|----|-------|-----|-----|-----|-----|---|---|---|---|---|---|---|---|---|---|---|---|---|---|---|---|---|---|---|---|---|---|---|---|---|---|---|---|---|---|---|---|---|---|---|---|---|---|---|---|
|    | 300   | 310 | 320 | 330 | 340 |   |   |   |   |   |   |   |   |   |   |   |   |   |   |   |   |   |   |   |   |   |   |   |   |   |   |   |   |   |   |   |   |   |   |   |   |   |   |   |   |
| Ah | PEVTR | DV  | V   | L   | L   | A | R | M | M | A | A | N | M | Y | F | T | Q | I | T | D | L | M | F | E | L | S | M | W | R | C | N | D | E | V | R | A | R | A | Q | E | L | R | S | Q | - |
| Bs | PEVTR | DV  | V   | L   | L   | A | R | M | M | A | A | N | M | Y | F | S | Q | I | Q | D | L | M | F | E | L | S | M | W | R | C | N | D | E | L | N | A | R | A | H | E | I | H | K | L | - |
| Ft | PEVTR | DV  | C   | L   | L   | A | R | M | M | T | S | N | M | Y | F | S | Q | I | E | D | L | M | I | E | M | S | M | W | R | C | N | S | E | L | R | V | R | A | E | E | L | Y | R | T | - |
| Ec | PEVTR | DV  | C   | L   | L   | A | R | M | M | A | A | N | L | Y | F | S | Q | I | E | D | L | M | F | E | L | S | M | W | R | C | N | D | E | L | R | A | R | A | D | E | L | L | D | S | A |
| Sb | PEVTR | DV  | C   | L   | L   | S | R | M | M | A | A | N | L | Y | I | N | Q | V | E | D | L | M | F | E | L | S | M | W | R | C | N | D | E | L | R | A | R | A | E | E | V | Q | S | T | P |
| Si | PEVTR | DV  | C   | L   | L   | A | R | M | M | A | S | N | L | Y | F | S | R | I | E | E | L | M | F | E | L | S | M | W | R | C | N | D | E | L | R | A | R | A | E | E | L | H | A | S | - |
| So | PEVTR | DV  | C   | L   | L   | S | R | M | M | A | A | N | L | Y | I | D | Q | V | E | D | L | M | F | E | L | S | M | W | R | C | N | D | E | L | R | A | R | A | E | E | V | Q | S | T | P |
| Zm | PEVTR | DV  | C   | L   | L   | A | R | M | M | A | A | N | L | Y | I | D | Q | I | E | E | L | M | F | E | L | S | M | W | R | C | N | D | E | L | R | V | R | A | E | E | L | H | S | S | S |

|    |     |     |     |     |     |   |   |   |   |   |   |   |   |   |   |   |   |   |   |   |   |   |   |   |   |   |   |   |   |   |   |   |   |   |   |   |   |   |   |   |   |   |   |   |   |   |   |   |
|----|-----|-----|-----|-----|-----|---|---|---|---|---|---|---|---|---|---|---|---|---|---|---|---|---|---|---|---|---|---|---|---|---|---|---|---|---|---|---|---|---|---|---|---|---|---|---|---|---|---|---|
|    | 350 | 360 | 370 | 380 | 390 |   |   |   |   |   |   |   |   |   |   |   |   |   |   |   |   |   |   |   |   |   |   |   |   |   |   |   |   |   |   |   |   |   |   |   |   |   |   |   |   |   |   |   |
| Ah | -SK | S   | D   | A   | K   | H | Y | I | E | F | W | K | O | I | P | L | S | E | P | Y | R | V | I | L | G | D | V | R | D | K | L | Y | N | T | R | E | H | A | H | Q | L | L | A | N | G | A | S | D |
| Bs | -SK | S   | D   | A   | K   | H | Y | I | E | F | W | K | P | I | P | P | S | E | P | Y | R | V | V | L | A | D | V | R | D | K | L | Y | H | T | R | E | H | A | R | Q | L | L | S | N | G | T | S | D |
| Ft | -AR | K   | D   | V   | K   | H | Y | I | E | F | W | K | R | I | P | P | N | Q | P | Y | R | V | I | L | G | D | V | R | D | K | L | Y | N | T | R | E | R | S | R | H | L | L | V | D | G | K | S | D |
| Ec | SK  | K   | T   | A   | N   | K | H | Y | I | E | F | W | R | G | I | P | P | N | E | P | Y | R | V | L | G | Y | V | R | D | K | L | Y | N | T | R | E | R | S | R | H | L | L | T | S | G | F | S | E |
| Sb | A   | S   | K   | K   | V   | T | K | Y | I | E | F | W | K | O | I | P | P | N | E | P | Y | R | V | L | G | A | V | R | D | K | L | Y | N | T | R | E | R | S | R | H | L | L | A | T | G | F | S | E |
| Si | -S  | Q   | R   | I   | S   | K | H | Y | I | E | F | W | R | O | L | P | A | N | E | P | Y | R | V | L | G | Y | V | R | D | E | L | Y | S | T | R | E | R | S | R | H | L | L | T | S | G | F | S | D |
| So | A   | S   | K   | K   | V   | T | K | Y | I | E | F | W | K | O | I | P | P | N | E | P | Y | R | V | L | G | A | V | R | D | K | L | Y | N | T | R | E | R | S | R | H | L | L | A | T | G | F | S | E |
| Zm | G   | S   | -   | K   | V   | T | K | Y | I | E | F | W | K | O | I | P | P | N | E | P | Y | R | V | L | G | H | V | R | D | K | L | Y | N | T | R | E | R | S | R | H | L | L | A | S | G | V | S | E |

|    |     |     |     |     |     |   |   |   |   |   |   |   |   |   |   |   |   |   |   |   |   |   |   |   |   |   |   |   |   |   |   |   |   |   |   |   |   |   |   |   |   |   |   |   |   |   |   |   |   |   |
|----|-----|-----|-----|-----|-----|---|---|---|---|---|---|---|---|---|---|---|---|---|---|---|---|---|---|---|---|---|---|---|---|---|---|---|---|---|---|---|---|---|---|---|---|---|---|---|---|---|---|---|---|---|
|    | 400 | 410 | 420 | 430 | 440 |   |   |   |   |   |   |   |   |   |   |   |   |   |   |   |   |   |   |   |   |   |   |   |   |   |   |   |   |   |   |   |   |   |   |   |   |   |   |   |   |   |   |   |   |   |
| Ah | V   | P   | E   | E   | S   | T | F | T | H | I | D | Q | F | L | E | P | L | E | L | C | Y | K | S | L | C | A | S | G | D | R | P | I | A | D | G | S | L | L | D | F | M | R | Q | V | S | T | F | G | L | S |
| Bs | V   | P   | L   | E   | S   | T | F | T | H | V | D | Q | F | L | E | P | L | E | L | C | Y | K | S | L | C | D | C | G | D | R | P | I | A | D | G | S | L | L | D | F | M | R | Q | V | S | T | F | G | L | C |
| Ft | I   | P   | D   | E   | A   | V | Y | T | N | V | E | Q | L | L | E | P | L | E | L | C | Y | R | S | L | C | D | C | G | D | H | V | I | A | D | G | S | L | L | D | F | L | R | Q | V | S | T | F | G | L | S |
| Ec | I   | T   | E   | D   | L   | V | F | T | N | I | E | E | F | L | E | P | L | E | L | C | Y | K | S | L | C | E | C | G | D | K | I | V | A | D | G | S | L | L | D | F | L | R | Q | V | S | T | F | G | L | S |
| Sb | I   | S   | E   | D   | A   | V | F | T | K | I | E | E | F | L | E | P | L | E | L | C | Y | K | S | L | C | E | C | G | D | K | A | I | A | D | G | S | L | L | D | L | L | R | Q | V | F | T | F | G | L | S |
| Si | I   | P   | E   | D   | S   | A | F | K | N | V | E | E | F | L | E | P | L | E | L | C | Y | K | S | L | C | D | C | G | D | K | T | I | A | D | G | S | L | L | D | F | M | R | Q | V | S | T | F | G | L | S |
| So | I   | S   | V   | D   | S   | V | F | T | N | I | E | E | F | L | E | P | L | E | L | C | Y | K | S | L | C | D | C | G | D | K | A | I | A | D | G | S | L | L | D | L | L | R | Q | V | F | T | F | G | L | S |
| Zm | I   | S   | A   | E   | S   | S | F | T | S | I | E | E | F | L | E | P | L | E | L | C | Y | K | S | L | C | D | C | G | D | K | A | I | A | D | G | S | L | L | D | L | L | R | Q | V | F | T | F | G | L | S |

|    | 450                                                                                           | 460 | 470 | 480 | 490 |
|----|-----------------------------------------------------------------------------------------------|-----|-----|-----|-----|
| Ah | L VKLD I RQES D R H T E V M D A I T T H L G I G S Y R S W S E E K R Q E W L L S E L R G K R P |     |     |     |     |
| Bs | L VKLD I RQES E R H T D V M D A I T K H L G V G S Y R E W S E E K R Q E W L L S E L R G T R P |     |     |     |     |
| Ft | L VKLD I RQES D R H T E V L D A I T Q H L G I G S Y R E W S E E K R Q E W L L A E L S G K R P |     |     |     |     |
| Ec | F VKLD I RQES E R H T D A I D A I T T H L G I G S Y K S W P E E K R Q E W L L S E L Q G K R P |     |     |     |     |
| Sb | L VKLD I RQES E R Q T D V I D A I T T H L G I G S Y R S W P E D K R M E W L V S E L K G K R P |     |     |     |     |
| Si | M VKLD I RQES E R H T D V I D A I T T H L G I G S Y R E W S E E K R Q E W L L S E L R G K R P |     |     |     |     |
| So | L VKLD I RQES E R H T D V I D A I T T Y L G I G S Y R S W P E D K R M E W L V S E L K G K R P |     |     |     |     |
| Zm | L VKLD I RQES E R H T D V I D A I T T H L G I G S Y R E W P E D K R Q E W L L S E L R G K R P |     |     |     |     |

|    | 500                                                                                                 | 510 | 520 | 530 | 540 |
|----|-----------------------------------------------------------------------------------------------------|-----|-----|-----|-----|
| Ah | L F G S D I P M S Y E V A D A I G T F R V L A E L P N D S F G A Y I I S M A T A P S D V L A V E L L |     |     |     |     |
| Bs | L F G S D I P K T E E I A A V I D T F H V I S E L P S D G F G A Y I I S M A T A P S D V L A V E L L |     |     |     |     |
| Ft | L I G P D I P K T E E V K D C L D T F K V L A E L P S D C F G A Y I I S M A T S T S D V L A V E L L |     |     |     |     |
| Ec | L L T P D P P T S D E V A D V L G C F R V L A E L P R D S F G P Y I I S M A T A P S D V P A V E L L |     |     |     |     |
| Sb | L L P P D I P M T E E I A D V I G A M R V L A E L P I D S F G P Y I I S M C T A P S D V L A V E L L |     |     |     |     |
| Si | L L S K D M P Q T E E I A D V L G C F H V L A E L P R D S F G P Y I I S M A T A P S D V L A V E L L |     |     |     |     |
| So | L L P P D I P M T E E I A D V I G A M H V L A E L P S D S F G P Y I I S M C T A P S D V L A V E L L |     |     |     |     |
| Zm | L L P P D I P Q T D E I A D V I G A F H V L A E L P P D S F G P Y I I S M A T A P S D V L A V E L L |     |     |     |     |

|    | 550                                                                                                 | 560 | 570 | 580 | 590 |
|----|-----------------------------------------------------------------------------------------------------|-----|-----|-----|-----|
| Ah | Q R E C G I K K P L R V V P L F E K L A D L Q S A A A S M T R L F S I D W Y K N R I N G T Q E V M I |     |     |     |     |
| Bs | Q R E C H I Q N P L R V V P L F E K L A D L E N A P A S I T R L F S I D W Y R N R I N G K Q E V M I |     |     |     |     |
| Ft | Q R E Y H I K H P L R V V P L F E K L A D L E A A P A A M T R L F S M D W Y R N R I D G K Q E V M I |     |     |     |     |
| Ec | Q R E C Q I K D P L P V V P L F E R L A D L R A G P A S V E R L F S T E W Y L K R I N G K Q O V M V |     |     |     |     |
| Sb | Q R E C G I R Q T L P V V P L F E R L A D L Q A A P A S V E K L F S T D W Y I N H I N G K Q O V M V |     |     |     |     |
| Si | Q R E C H V K Q P L P V V P L F E K L A D L Q S A P A S I E R L F S L D W Y M N R I G G K Q O V M V |     |     |     |     |
| So | Q R E C G I R Q T L P V V P L F E R L A D L Q A A P A S V E R L F S T D W Y F D H I K G K Q O V M V |     |     |     |     |
| Zm | Q R E C G V R Q P L P V V P L F E R L A D L Q S A P A S V E R L F S V D W Y M D R I K G K Q O V M V |     |     |     |     |

|    | 600                                                                                                 | 610 | 620 | 630 | 640 |
|----|-----------------------------------------------------------------------------------------------------|-----|-----|-----|-----|
| Ah | G Y S D S G K D A G R L S A A W Q L Y K V Q E Q L I Q V A K E Y G V K L T M F H G R G G T V G R G G |     |     |     |     |
| Bs | G Y S D S G K D A G R L S A A W Q L Y K A Q E E L I K I A K E F G V K L T M F H G R G G T V G R G G |     |     |     |     |
| Ft | G Y S D S G K D A G R F S A A W Q L Y K T Q E Q I V K I A K E F G V K L V I F H G R G G T V G R G G |     |     |     |     |
| Ec | G Y S D S G K D A G R L S A A W A L Y R A Q E G M A E V A K K Y G V Q I T F F H G R G G T V G R G G |     |     |     |     |
| Sb | G Y S D S G K D A G R L S A A W Q L Y V A Q E E M A K V A K K Y G V K L T L F H G R G G T V G R G G |     |     |     |     |
| Si | G Y S D S G K D A G R L S A A W H L Y K A Q E A M A K V A K R Y G V K L T M F H G R G G T V G R G G |     |     |     |     |
| So | G Y S D S G K D A G R L S A A W Q L Y V A Q E E M A K V A K K Y G V K L T L F H G R G G T V G R G G |     |     |     |     |
| Zm | G Y S D S G K D A G R L S A A W Q L Y R A Q E E M A Q V A K R Y G V K L T L F H G R G G T V G R G G |     |     |     |     |

|    | 650                                                                                                 | 660 | 670 | 680 | 690 |
|----|-----------------------------------------------------------------------------------------------------|-----|-----|-----|-----|
| Ah | G P T H L A I L S Q P P -- D T I H G S L R V T I Q G E V I E Q S F G E E H L C F R T L E R Y T A A  |     |     |     |     |
| Bs | G P T H L A I L S Q P P E H D S M D - H F V L P F K V K C I E Q S F G E E H L C F R T L Q R F T A A |     |     |     |     |
| Ft | G P T H L A I L S Q P P -- D T I N G S L R V T V Q G E V I E Q S F G E E H L C F R T L Q R F C A A  |     |     |     |     |
| Ec | G P T H L A I L S Q P P -- N T I N G S L R V T I Q G E V I E H S F G E E H L C F R T L Q R F T A A  |     |     |     |     |
| Sb | G P T H L A I L S Q P P -- D T I N G S I R V T V Q G E V I E F M F G E E N L C F Q S L Q R F T A A  |     |     |     |     |
| Si | G P T H L A I L S Q P P -- D T I N G S L R V T V Q G E V I E T S F G E E H L C F R T L Q R F T A A  |     |     |     |     |
| So | G P T H L A I L S Q P P -- D T I N G S I R V T V Q G E V I E F M F G E D H L C F Q S L Q R F T A A  |     |     |     |     |
| Zm | G P T H L A I L S Q P P -- D T I N G S I R V T V Q G E V I E F C F G E E H L C F Q T L Q R F T A A  |     |     |     |     |

|    | 700                                                                                                 | 710 | 720 | 730 | 740 |
|----|-----------------------------------------------------------------------------------------------------|-----|-----|-----|-----|
| Ah | T L E H G M H P P T S P K P E W R A L M D E M A V I T T K E Y R S V V L Q E P R F V E Y F R S A T P |     |     |     |     |
| Bs | T L E H G M H P P I S P K P E W R T L L D E M A V A A T K E Y R S I V L K K P R F V E Y F R L A T P |     |     |     |     |
| Ft | T L E H G M N P P I S P R P E W R E L M D O M A V V A T E E Y R S V V F K E P R F V E Y F R L A T P |     |     |     |     |
| Ec | T L E H G M H P P A S P K P E W R A L M D E V T A V A T E E Y R S Y V F K E P R F V E Y F R S A T P |     |     |     |     |
| Sb | T L E H G M H P P V S P K P E W R K L M E E M A V V A T E E Y R S V V V K E P R F V E Y F R S A T P |     |     |     |     |
| Si | T L E H G M H P P V S P K P E W R A L M D E I A A V A T D E Y R S V V M R E P R F V E Y F R S A T P |     |     |     |     |
| So | T L E H G M H P P V S P K P E W R K L M E E M A V V A T E E Y R S V V V K E P R F V E Y F R S A T P |     |     |     |     |
| Zm | T L E H G M H P P V S P K P E W R K L M D E M A V V A T E E Y R S V V V K E A R F V E Y F R S A T P |     |     |     |     |

|    |                                     |                                  |       |     |     |
|----|-------------------------------------|----------------------------------|-------|-----|-----|
|    | 750                                 | 760                              | 770   | 780 | 790 |
| Ah | EL EY GR MN IG SR PA KR KP GG GI ET | LR AI PW IF SW TQ TR FH LP VW LG | CG AA |     |     |
| Bs | EL EY GR MN IG SR PS KR KP GG GIE S | LR AI PW IF SW TQ TR FH LP GG LG | CG AA |     |     |
| Ft | EL EF GR MN IG SR PS KR KP S GG IES | LR AI PW IF SW TQ TR FH LP VW LG | FG AA |     |     |
| Ec | ET EY GR LN IG SR PA KR KP GG GT ES | LR AI PW IF SW TQ TR FH LP VW LG | FG AA |     |     |
| Sb | ET EY GK MN IG SR PA KR RP GG GI TT | LR AI PW IF SW TQ TR FH LP VW LG | VG AA |     |     |
| Si | ET EY GR LN IG SR PA KR KP KG GI ES | LR AI PW IF SW TQ TR FH LP VW LG | FG AA |     |     |
| So | ET EY GK MN IG SR PA KR KP GG GI TT | LR AI PW IF SW TQ TR FH LP VW LG | VG AA |     |     |
| Zm | ET EY GR MN IG SR PA KR RP GG GI TT | LR AI PW IF SW TQ TR FH LP VW LG | VG AA |     |     |

|    |                                             |                             |     |     |     |
|----|---------------------------------------------|-----------------------------|-----|-----|-----|
|    | 800                                         | 810                         | 820 | 830 | 840 |
| Ah | FK HV IE KD IK -NL AM LK DM YN QW S FFR VTI | DL LEM VFA KG DP GI AAL YDK |     |     |     |
| Bs | FK HV IE KD IK -NL AM LE QM YN EW P FFR VTI | DL VEM VFA KG DP GI AAL YDK |     |     |     |
| Ft | FK HA IQ KDSK -NL OM LQ EM YK TW P FFR VTI  | DL VEM VFA KG NP GI AAL NDK |     |     |     |
| Ec | FN LR HQ EG TS GN IQ TL KE MY NE WP FFR VTI | DL VEM VFA KG DP GI VGF YND |     |     |     |
| Sb | FK WA ID KD IK -NF QK LK EM YN EW P FFR VTI | DL LEM VFA KG DP GI AGL YDE |     |     |     |
| Si | FE HA MK KD IK -NF RM LK EM YN EW P FFR VTI | DL LEM VFA KG DP TI AGL YDQ |     |     |     |
| So | FK WA ID KD IK -NF QK LK EM YN EW P FFR VTI | DL LEM VFA KG DP GI AGL YDL |     |     |     |
| Zm | FK FA ID KD VR -NF QV LK EM YN EW P FFR VTI | DL LEM VFA KG DP GI AGL YDE |     |     |     |

|    |                                                    |                       |     |     |     |
|----|----------------------------------------------------|-----------------------|-----|-----|-----|
|    | 850                                                | 860                   | 870 | 880 | 890 |
| Ah | LL VK DE LK PF GE NL RK SY LE AQ KF LLE IAG HKD PL | DAD PY LK QI LR LR DP |     |     |     |
| Bs | LL VSE EL CP FG EQL RSD YEE TKN FFF QI AG HK E ILE | GDP HLR QR LR LR DP   |     |     |     |
| Ft | LL VSE DL RP FG ESL RAN YEE TKN YLL KI AG HK DL    | LEG DP YL KQG IRL RDP |     |     |     |
| Ec | LL VA DEL KPF GE QLR KNY ID TCS FSCR LLG TRKS      | LEG DP YL KQRL HLR DP |     |     |     |
| Sb | LL VA EEL KPF GK QLR DKY VET QQL LLO IAG HKD ILE   | GDP YL KQGL RLR NP    |     |     |     |
| Si | LL VA DEL KPF GE QLR NNY VET EKL ILO VAG HK E ILE  | SDP GLK QQL RLR DP    |     |     |     |
| So | LL VA DDL KPF GK QLR DKY VET EKL LLO IAG HKD ILE   | GDP YL KQGL RLR NP    |     |     |     |
| Zm | LL VA EEL KPF GK QLR DKY VET QQL LLO IAG HKD ILE   | GDP FLK QGL VLR NP    |     |     |     |

|    |                                                    |                    |     |     |     |
|----|----------------------------------------------------|--------------------|-----|-----|-----|
|    | 900                                                | 910                | 920 | 930 | 940 |
| Ah | YT TT LNV FQV YTL KR IR DP SFH VTVR PH LSK EMDA -  | NS LA AE LVK LNP T |     |     |     |
| Bs | YT TT LNV CQAY TL KR IR DP NYH VTVR PH ISK DY MDST | DK PA AE LVK LNP S |     |     |     |
| Ft | YT TT LNV CQAY TL KR IR DP NYH VTLR PH ISK EY AAEP | SK PA DE LIH LNP T |     |     |     |
| Ec | YT TT LNV FQAY TL KR IR DP NFK VTLN PPLS NEFADE    | -NKPAG -LVK LNP A  |     |     |     |
| Sb | YT TT LNV FQAY TL KR IR DP SFK VTP QP PLS KEFADE   | -NKPAG -LVK LN -G  |     |     |     |
| Si | YT TT LNV WQAY TL KR IR DP NFK VTP QP PLS KEFADE   | -NQ PRG -IVK LNP A |     |     |     |
| So | YT TT LNV LQAY TL KR IR DP CFK VTP QP PLS KEFADE   | -NKPAG -LVK LNP A  |     |     |     |
| Zm | YT TT LNV FQAY TL KR IR DP NFK VTP QP PLS KEFADE   | -NKPAG -LVK LNP A  |     |     |     |

|    |                                           |     |
|----|-------------------------------------------|-----|
|    | 950                                       | 960 |
| Ah | SE YP P GLED TL I L T M KG IA AG M Q NT G |     |
| Bs | SE YA P GLED TL I L T M KG IA AG M Q NT G |     |
| Ft | SE YA P GLED TL I L T M KG IA AG M Q NT G |     |
| Ec | SE YG P GLED TL I L T M KG IA AG M Q NT G |     |
| Sb | ER VP P GLED TL I L T M KG IA AG M Q NT G |     |
| Si | SE YG P GLED TL I L T M KG IA AG M Q NT G |     |
| So | SE YP P GLED TL I L T M KG IA AG M Q NT G |     |
| Zm | SE YP P GLED TL I L T M KG IA AG M Q NT G |     |

## 1.2 Multiple Sequence Alignment of PPKD

```

Ah  MMAS-AYKGI LARSNHDICAQAL----LKVRLDQIGYLNDQNL LGRS RC
Bs  -----MLIR SAPDVFTHTL-----GYMKDQYQVGC SQC
Ft  MMSLSL SVEGML LKSARE SCLPAR----VNORRNGDLRLRNHHRQSSSFVRC
Ec  MAASVSRAVCG LQGSCLNGRRSRDAP-S-GRRSVAAPRV-WPSKAGV LLL
Sb  MAASVSGATIC LQKPGSKSRRARDATS SFARRSVAAPRSPHAAKASVIRS
Si  -MASVSRAVWS LQRPVSNGTMTREAP-S-GRRSVAAPRS-RRAKAVVIRS
So  MAASVSGATIC LQKPGSKGRRARDAT-SFARRSVAAPRSPHAAKASVIRS
Zm  MAASVSR A-ICVQKPGSKCTRDREAT-SFARRSVAAPRPPHAKAAGVIRS

Ah  KSI RRVKYQN-KKCLDQNA RH LRSP--TVM AVVSEPI-ATAK KR VFTFGK
Bs  NSFQRVQFRNRRC PHRLTSQSQSNRQDVMALISDPVSTTTQQRVFTFGK
Ft  LTPARVSRPE-LR-----SSGLT PPR-AVLN PVSPPV-TTAKKR VFTFGK
Ec  GSGS-----GR-----SQHCAPAN-AIAD--AVPI--ATKKRVFLFGK
Sb  DAGA-----GR-----GQHCAPLR-AVVD--AAP I--ATKKRVFYFGK
Si  ESGS-----GR-----GEHCAPAR-AVAD--VAPI-QATKKRVFHFHGK
So  DAGA-----GR-----GQHCS PMR-AVVD--AAP I--ATKKRVFYFGK
Zm  DSGA-----GR-----GQHCS PLR-AVVD--AAP I-QT TKKRVFHFHGK

Ah  GRSEGNKSMKS LLGGKGANLAEMS SIGLSVPPGLTIISTEACQEYQEN GKK
Bs  GRSDGDKSMKS LLGGKGANLAEMA SIGLSVPPGLTIISTEACQEYQDS GKM
Ft  GRSEGNRDMKS LLGGKGANLAEMS SIGLSVPPGLTIISTEACEEYQQNGKS
Ec  GKSEGNRGMKE LLGGKGANLAEMS SIGLSVPPGFTVSTEACEEYQAAGCT
Sb  GKSEGDKSMKE LLGGKGANLAEMS SIGLSVPPGFTVSTEACKQYQDAGCI
Si  GKSEGNETMKE LLGGKGANLAEMS SIGLSVPPGFTVSTEACKQYQEAGRS
So  GKSEGDKSMKE LLGGKGANLAEMS SIGLSVPPGFTVSTEACKQNQDAGSI
Zm  GKSEGNKTMKE LLGGKGANLAEMA SIGLSVPPGFTVSTEACKQYQDAGCA

Ah  LPESLWEEILEGLRVIENDMGAA LGDSSK P L L L S V R S G A A I S M P G M M D T V
Bs  LPESLWEEILEGLRVIESDMGAY LGDSS T P L L L S V R S G A A I S M P G M M D T I
Ft  LPPGLWDEISEGLDYVOKEMSAS LGDP SK P L L L S V R S G A A I S M P G M M D T V
Ec  LPQGLWDEVLDGLAWVEEYMGAG LGDPQR P L L L S V R S G A A V S M P G M M D T V
Sb  LPAGLWAEILDGLQFVEEYMGAT LGDPQR P L L L S V R S G A A V S M P G M M D T V
Si  LPQGLWDEIIDGLAWVEEEMGAR LGDPQR P L L L S V R S G A A V S M P G M M D T V
So  LPAGHWREILDGLQFVEEYMGAT LGDPQR P L L L S E R S G S R G V Q A G M M D T V
Zm  LPAGLWAEIVDGLQWVEEYMGAT LGDPQR P L L L S V R S G A A V S M P G M M D T V

Ah  LNLGLNDEVVTALA AKSGERFAYD SFRRFLDMF GGVVMG IPHSAFEEKLE
Bs  LNLGLNDEVVSGLA AKSGERFAYD SFRRFLDMF GCVVMG IPHSSFEEKLE
Ft  LNLGLNDEVVAGLAGKSGARFAYD SYRRFLDMF GNVVMG IPHSLFDEKLE
Ec  LNLGLNDEVAAGLA AKSGDRFAYD SYRRFLDMF GNVVLD IPHALFEEKLE
Sb  LNLGLNDEVAAGLA AKSGERFAYD SFRRFLDMF GNVVMD IPRSLFEKLE
Si  LNLGLNDEVAAGLGA KSGERFAND SYRRFLDMF GNVVMD IPHALFEEKLE
So  LNLGLNDEVAAGLA AKSGERFDYD TFRRFHDMYGNVVM DIPRSLIEEKLE
Zm  LNLGLNDEVAAGLA AKSGERFAYD SFRRFLDMF GNVVMD IPRSLFEKLE

```

|    |       |       |             |         |           |        |       |         |      |
|----|-------|-------|-------------|---------|-----------|--------|-------|---------|------|
|    | 240   | 250   | 260         | 270     | 280       |        |       |         |      |
| Ah | KLKEE | KGVKL | DTELTAS     | DLKELAE | QYKNVYLET | TGEAF  | SPSS  | PLKQL   | QLAV |
| Bs | KLKQM | KGVKL | DTELTAS     | DLKELAE | QYKNVYLET | KGEVFP | ADPKK | QQLAV   |      |
| Ft | QMKAE | KGIHL | DTDLTAA     | DLKDLV  | EKYKNVY   | VEAKGE | KFPID | PKKQLE  | LAV  |
| Ec | HMKEA | KG    | LKNDDTDLTAS | DLKELVE | QYKDVY    | VEAKGE | PFPSP | DPKKQLE | LSV  |
| Sb | HMKES | KG    | VKNDDTDLTAA | DLKELVG | QYKEVYL   | TAKGE  | PFPSP | DPKKQLE | LAV  |
| Si | AMKEA | KG    | VKNDDTDLTAS | DLKELVA | QYKEVY    | VEAKGE | PFPSP | DPKKQLE | LAV  |
| So | HMKES | KG    | VKNDDTDLTAA | DLKELVG | QYKEVYL   | TAKGE  | PFPSP | DPKKQLE | LAV  |
| Zm | HMKES | KG    | LKNDDTDLTAS | DLKELVG | QYKEVYLS  | AKGE   | PFPSP | DPKKQLE | LAV  |

|    |       |          |          |         |       |          |        |      |
|----|-------|----------|----------|---------|-------|----------|--------|------|
|    | 290   | 300      | 310      | 320     | 330   |          |        |      |
| Ah | EAVFE | SWDSPRAN | KYRSINQ  | ISGLKGA | AVNIQ | SMVFGNMG | NTSGTG | VLFT |
| Bs | QAVFD | SWDSPRA  | VKYRSINQ | ISGLKGT | AVNIQ | SMVFGNMG | NTSGTG | VLFT |
| Ft | NAVFD | SWDSPRAN | KYRSINQ  | ITGLKGT | AVNIQ | SMVFGNMG | NTSGTG | VLFT |
| Ec | LAVFN | SWDSPRA  | KKYRSINQ | ITGLRGT | AVNVQ | CMVFGNMG | KTSGTG | VLFT |
| Sb | RAVFN | SWESPRA  | KKYRSINQ | ITGLVGT | AVNVQ | SMVFGNMG | NTSGTG | VLFT |
| Si | LAVFN | SWDSPRAN | KYRSINQ  | ITGLKGT | AVNVQ | SMVFGNMG | DTSGTG | VLFT |
| So | RAVFN | SWESPRA  | KKYRSINQ | ITGLVGT | AVNVQ | SMVFGNMG | NTSGTG | VLFT |
| Zm | LAVFN | SWESPRA  | KKYRSINQ | ITGLRGT | AVNVQ | CMVFGNMG | NTSGTG | VLFT |

|    |       |           |           |            |     |        |    |        |     |
|----|-------|-----------|-----------|------------|-----|--------|----|--------|-----|
|    | 340   | 350       | 360       | 370        | 380 |        |    |        |     |
| Ah | RNPS  | TGEKKLYGE | FLINAQGED | VVAGIRTPED | L   | GAMERC | MP | EAYKEL | VEN |
| Bs | RNPNT | TGERKLYGE | FLINAQGED | VVAGIRTPED | L   | DTMKSC | MP | EAYTEL | VON |
| Ft | RNPS  | TGEKKLYGE | FLINAQGED | VVAGIRTPED | L   | GTMETC | MP | EAYKEL | VEN |
| Ec | RNPS  | TGEKKLYGE | FLVNAQGED | VVAGIRTPED | L   | DAMKDC | MP | QAFEEL | VEN |
| Sb | RNPNT | TGEKKLYGE | FLINAQGED | VVAGIRTPED | L   | DAMKDV | MP | QAYEEL | VEN |
| Si | RNPS  | TGEKKLYGE | FLVNAQGED | VVAGIRTPED | L   | DAMKAQ | MP | DAYVEL | VEN |
| So | RNPNT | TGEKKLYGE | FLINAQGED | VVAGIRTPED | L   | DAMKDV | MP | QAYEEL | VEN |
| Zm | RNPNT | TGEKKLYGE | FLVNAQGED | VVAGIRTPED | L   | DAMKNL | MP | QAYDEL | VEN |

|    |       |           |     |                  |        |        |       |        |
|----|-------|-----------|-----|------------------|--------|--------|-------|--------|
|    | 390   | 400       | 410 | 420              | 430    |        |       |        |
| Ah | CEILE | QHYKDMQ   | DI  | EFTVQENRLWMLQCRS | GKRTGK | GAVKI  | IAVD  | LVNEGI |
| Bs | CEILE | QHYKDMMD  | DI  | EFTVQENRLWMLQCRS | GKRTGK | GAVKI  | IAID  | MVNEGK |
| Ft | CEILE | RHYKDMMD  | DI  | EFTVQENRLWMLQCRT | GKRTGK | GAVRI  | IAVDM | VNEGL  |
| Ec | CNLL  | EGHYKDLMD | DI  | EFTVQENRLWMLQCRS | GKRTGK | GAVKI  | IAVD  | VVNEGL |
| Sb | CNILE | SHYKEMQ   | DI  | EFTVQGNRLWMLQCRT | GKRTG  | AGAVKI | IAVDM | VSEGL  |
| Si | CKILE | SHYKEMMD  | DI  | EFTVQENRLWMLQCRS | GKRTG  | QGAVKI | IAVDM | VNEGL  |
| So | CNILE | SHYKEMQ   | DI  | EFTVQENRLWMLQCRT | GKQTGT | GAVKI  | IAVDM | VSEGL  |
| Zm | CNILE | SHYKEMQ   | DI  | EFTVQENRLWMLQCRT | GKRTG  | KSAVKI | IAVDM | VNEGL  |

|    |       |         |       |          |         |       |       |     |        |
|----|-------|---------|-------|----------|---------|-------|-------|-----|--------|
|    | 440   | 450     | 460   | 470      | 480     |       |       |     |        |
| Ah | VDTNT | AVKMVEP | QHLDQ | LLHPQFED | PSAYKD  | KVIAT | GLPAS | PGA | AVGQIV |
| Bs | INSRT | AIKMVEP | QHLDQ | LLHPQFED | ASAYKER | VITS  | GLPAS | PGA | AVGQIV |
| Ft | IDTRT | AIKRVET | QHLDQ | LLHPQFED | PSAYKSH | VVAT  | GLPAS | PGA | AVGQVC |
| Ec | VDRHA | AIKMVEP | GHLDQ | LLHPQFEN | PSAYKD  | QVIAT | GLPAS | PGA | AVGQIV |
| Sb | VERRQ | AIKMVEP | GHLDQ | LLHPQFEN | PAAYKD  | KVIAT | GLPAS | PGA | AVGQIV |
| Si | VERRQ | AIKMVEP | GHLDH | LLHPQFEN | PSAYKD  | QVIAT | GLPAS | PGA | AVGQIV |
| So | AERRQ | AIKMVEP | GHLDQ | LLHPQFEN | AAAYKD  | QVIAT | GLPAS | PGA | AVGQIV |
| Zm | VEPRS | AIKMVEP | GHLDQ | LLHPQFEN | PSAYKD  | QVIAT | GLPAS | PGA | AVGQVV |

|    |       |         |        |        |         |         |        |       |         |    |
|----|-------|---------|--------|--------|---------|---------|--------|-------|---------|----|
|    | 490   | 500     | 510    | 520    | 530     |         |        |       |         |    |
| Ah | FSAED | DAEAWHA | QGKSA  | VILVTR | TETSPED | VGGMHV  | AAGILT | ARGGI | TSHA    | AV |
| Bs | FSAAY | DAEAWHA | QGKSA  | AILVTR | NETSPED | VGGMHAA | AAGILT | ARGG  | MTSHA   | AV |
| Ft | FSAED | DAETWHA | QGKSA  | AILVTR | TETSPED | VGGMHAA | AAGILT | ARGG  | MTSHA   | AV |
| Ec | FTAED | DAEAWHA | QGKAA  | AILVTR | TETSPED | VGGMHAA | AAGILT | ARGG  | MTSHA   | AV |
| Sb | FTAED | DAEAWHA | QGKAA  | AILVRA | AETSPED | VGGMHAA | AAGILT | ERG   | GGMTSHA | AV |
| Si | FTAED | DAEAWHA | QGKAA  | AILVTR | TETSPED | VGGMHAA | AVGILT | ARGG  | MTSHA   | AV |
| So | STAED | DAEAWHA | QGKAA  | AILVRA | AETSPED | VGGMHAA | AAGILT | ERG   | GGMTSHA | AV |
| Zm | FTAED | DAEAWH  | SQGKAA | AILVRA | AETSPED | VGGMHAA | AVGILT | ERG   | GGMTSHA | AV |



|    | 540              | 550        | 560       | 570          | 580      |
|----|------------------|------------|-----------|--------------|----------|
| Ah | VARGWGKCCVSGCSEI | QVNDAKKVV  | VTIGNNVLA | EGDWLSLNGT   | TGGEVILG |
| Bs | VARGWGKCCVSGCSEI | KVNETNKS   | LVVGNVLT  | EGDWLSLNGS   | TGGEVILG |
| Ft | VARGWGKCCVSGCAD  | IRVNDDMKI  | FTIGDRV   | IKEGDWLSLNGT | TGGEVILG |
| Ec | VARGWGKCCVSGCAS  | VRVNDAEKVV | VAIGDKV   | LQEGDWLSLNGS | TGGEVILG |
| Sb | VARGWGKCCVSGCSA  | IRVNDAEKTV | VAIGDHV   | LSEGEWLSLNGS | TGGEVILG |
| Si | VARGWGKCCVSGCSS  | VLVNDAEKSV | VIGDKVM   | HEGEWLSLNGS  | TGGEVIVG |
| So | VARGWGKCCVSGCSA  | IRVNDAEKTV | VAIGDHV   | LSEGEWLSLNGS | TGGEVILG |
| Zm | VARWVGKCCVSGCSG  | IRVNDAEKLV | VTIGSHV   | LREGEWLSLNGS | TGGEVILG |

|    | 590        | 600         | 610        | 620        | 630   |          |         |      |
|----|------------|-------------|------------|------------|-------|----------|---------|------|
| Ah | KEPLAPPALS | GDLEVFMSWAD | NLRRLKVM   | ANADTPE    | DAL   | TARNNGAE | GIG     |      |
| Bs | KEPLSPPALS | GDLETFMSWT  | DAVRRRLKVM | ANADTPE    | DALA  | AARNNGAE | GIG     |      |
| Ft | KQLLAPPAMS | NDLEIFMSWAD | QARRRLKVM  | ANADTPN    | DAL   | TARNNGA  | QGIG    |      |
| Ec | KQPLSPPALS | GDLGIFMSWV  | DEVKLV     | LANADTPE   | DALA  | AARNNGAE | GIG     |      |
| Sb | KQPLSPPALS | GDLGTFMSWV  | DDVRKLV    | LANADTP    | GDALA | AARNNGA  | QGIG    |      |
| Si | KQPLSPPVLS | GDLGTFMSWV  | DEVQ       | LVLANADTPE | DAL   | TARNNGAE | GIG     |      |
| So | KQPLSPPSLS | GDLGTFMSWV  | DEVKLV     | LANADTPE   | DALA  | AARNNGA  | QGIG    |      |
| Zm | KQPLSPPALS | GDLGTFMAWV  | DDVRKLV    | LANADTP    | D     | DAL      | TARNNGA | QGIG |

|    | 640          | 650      | 660       | 670      | 680            |
|----|--------------|----------|-----------|----------|----------------|
| Ah | LCRTEHMFASDD | RIKTVRKM | MIMAVTPE  | QRKAALDQ | LLPYQRSDFEGIFR |
| Bs | LCRTEHMFASDD | RIKAVRKM | MIMAVTPE  | QRKAALDQ | LLPYQRSDFEGIFR |
| Ft | LCRTEHMFASD  | RIKAVRKM | MIMAVTPE  | QRKVALDL | LLPYQRSDFEGIFR |
| Ec | LCRTEHMFASD  | RIKAVRQ  | MIMAPTLE  | LRQKALDR | LLPYQRSDFEGIFR |
| Sb | LCRTEHMFASD  | RIKAVRQ  | MIMAPTVEL | RQQALDR  | LLPYQRSDFEGIFR |
| Si | LCRTEHMFASD  | RIKAVRQ  | MIMAPTLE  | LRQKALDR | LLPYQRSDFEGIFR |
| So | LCRTEHMFASD  | RIKAVRQ  | MIMAPTVEL | RQQALDR  | LLPYQRSDFEGIFR |
| Zm | LCRTEHMFASD  | RIKAVRQ  | MIMAPTLE  | LRQQALDR | LLTYQRSDFEGIFR |

|    | 690            | 700    | 710    | 720      | 730     |              |
|----|----------------|--------|--------|----------|---------|--------------|
| Ah | AMDGLPVTIRLLDP | PLHEFP | PEGDLD | EIVKDL   | ASEVGMT | EDEVYSRIEKL  |
| Bs | AMDGLPVTIRLLDP | PLHEFL | PEGDLQ | QIMNEL   | ASETGIT | EDEVYSRVEKL  |
| Ft | AMDGLPVTIRLLDP | PLHEFL | PEGDL  | EHIVNEL  | AVDTGMS | ADEIYSKIENL  |
| Ec | AMDGLPVTIRLLDP | PLHEFL | PEGNV  | EIVREL   | CAETGS  | NEEEALARIEKL |
| Sb | AMDGLSVTIRLLDP | PLHEFL | PEGNV  | EIVREL   | CAETGAN | EEAALERVEKL  |
| Si | AMDGLSVTIRLLDP | PLHEFL | PDGN   | VEDIVREL | CSETGAN | QEEALARIESL  |
| So | AMDGLSVTIRLLDP | PLHEFL | PEGNV  | EIVREL   | CAETGAN | EEAALERVEKL  |
| Zm | AMDGLPVTIRLLD  | HPSEF  | LPEGN  | IEDIVSEL | CAETGAN | QEDALARIEKL  |

|    | 740              | 750          | 760    | 770   | 780   |           |
|----|------------------|--------------|--------|-------|-------|-----------|
| Ah | SEVNPMLGFRGCRLGI | SYPELTEMQARA | IFQA   | AVSMT | NQGIK | VLPEIMVP  |
| Bs | SEVNPMLGFRGCRLGI | SYPELTEMQARA | VFQA   | AVSMT | NQGIT | VLPEIMVP  |
| Ft | SEVNPMLGFRGCRLGI | SYPELTEMQV   | RAIFQA | AVSMT | NQGV  | TVIPEIMVP |
| Ec | SEVNPMLGFRGCRLGI | SYPELTEMQARA | IFEAA  | TMTKP | GCS   | SFSDNVP   |
| Sb | AEVNPMLGFRGCRLGI | SYPELTEMQARA | IFEAA  | IAMS  | NQGV  | VFPEIMVP  |
| Si | SEVNPMLGFRGCRLGI | SYPELTEMQARA | IFEAA  | IAM   | NQGV  | VFPEIMVP  |
| So | AEVNPMLGFRGCRLGI | SYPELTEMQARA | IFEAA  | IAMS  | NQGV  | VFPEIMVP  |
| Zm | SEVNPMLGFRGCRLGI | SYPELTEMQARA | IFEAA  | IAM   | NQGV  | VFPEIMVP  |

|    | 790         | 800   | 810    | 820    | 830     |                          |
|----|-------------|-------|--------|--------|---------|--------------------------|
| Ah | LVGTPQELSHQ | MGVIR | DVASKV | FSETG  | TTLTFKV | GTMIEIPRAALIADEI         |
| Bs | LVGTPQELGHQ | VNLR  | SVATK  | VFSEM  | GSSVR   | YKVGTMIEIPRAALVADEI      |
| Ft | LVGTPQELRHQ | ISV   | IRGVA  | ANVFA  | EMGVT   | LEYKVGTMIEIPRAALIAEEI    |
| Ec | LVGTPQELGHQ | VAV   | IREIAN | TVFTAM | GKTIS   | YKIGTMIEIPRAALVADEI      |
| Sb | LVGTPQELGHQ | VNV   | IKQTA  | EKFV   | ANAGKT  | IGYKIGTMIEIPRAALVADQI    |
| Si | LVGTPQELGNQ | VAL   | IRETAN | KVFAAL | GKTID   | YKIGTMIEIPRAALVADEI      |
| So | LVGLPQELGHQ | VNV   | IKQVA  | EKFV   | TSMGKT  | IGYKIGTMIEIPRAALVADQI    |
| Zm | LVGTPQELGHQ | VTL   | IRQVA  | EKFV   | ANV     | GKTIGYKVGTMIEIPRAALVADEI |

|    |       |           |           |         |        |        |       |       |      |
|----|-------|-----------|-----------|---------|--------|--------|-------|-------|------|
|    | 840   | 850       | 860       | 870     | 880    |        |       |       |      |
| Ah | AKEAE | FFSFGTNDL | TQMTFGYSR | DDVGKFL | LP     | PIYMAQ | GILQT | DPFEV | LDQK |
| Bs | AVEAD | FFSFGTNDL | TQMTFGYSR | DDVGKFL | LP     | KYLSN  | GILQA | DPFEV | LDQK |
| Ft | GKEAD | FFSFGTNDL | TQMTFGYSR | DDVGKFL | Q      | IYLAQ  | GILQH | DPFEV | IDQK |
| Ec | AEQAE | FFSFGTNDL | TQMTFGYSR | DDVGKFL | PIYLS  | SO     | GILQH | DPFEV | LDQR |
| Sb | AEQAE | FFSFGTNDL | TQMTFGYSR | DDVGKFL | PIYLAQ | GILQH  | DPFEV | LDQR  |      |
| Si | AEQAE | FFSFGTNDL | TQMTFGYSR | DDVGKFL | PIYLS  | SO     | GILQH | DPFEV | LDQR |
| So | AEQAE | FFSFGTNDL | TQMTFGYSR | DDVGKFL | PIYLAQ | GILQH  | DPFEV | LDQR  |      |
| Zm | AEQAE | FFSFGTNDL | TQMTFGYSR | DDVGKFL | IPVH   | LAQ    | GILQH | DPFEV | LDQR |

|    |       |     |       |        |         |         |        |       |      |        |       |
|----|-------|-----|-------|--------|---------|---------|--------|-------|------|--------|-------|
|    | 890   | 900 | 910   | 920    | 930     |         |        |       |      |        |       |
| Ah | GVGQL | LIK | HATEK | GRASRP | SLKVGIC | GEHGGEP | SSVAFF | AEA   | GLDY | VSCSP  |       |
| Bs | GVGQL | LIK | LATEK | GRAAKP | SLKVGIC | GEHGGEP | SSVAFF | AEA   | GLDY | VSCSP  |       |
| Ft | GVGQL | LIK | MATEK | GRAANP | SLKVGIC | GEHGGEP | SSVAFF | DGV   | GLDY | VSCSP  |       |
| Ec | GVGEL | LVK | FATER | GRKTRP | NLKVGIC | GEHGGEP | L      | SVAFF | AKT  | GLDY   | VSCSP |
| Sb | GVGEL | LVK | FATER | GRQTRP | NLKVGIC | GEHGGEP | SSVAFF | AKV   | GLDY | VSCSP  |       |
| Si | GVGEL | LVK | FATER | GRKARP | NLKVGIC | GEHGGEP | SSVAFF | AKS   | GLDY | VSCSP  |       |
| So | GVGEL | LVK | FATER | GRQTRP | NLKVGIC | GEHGGEP | SSVAFF | AKA   | GLDY | VSCSP  |       |
| Zm | GVGEL | LVK | FATER | GRKARP | NLKVGIC | GEHGGEP | SSVAFF | AKA   | GLD  | FVSCSP |       |

|    |              |     |
|----|--------------|-----|
|    | 940          | 950 |
| Ah | FRVPIARLAAAQ | VAV |
| Bs | FRVPIARLAAAQ | VAV |
| Ft | FRVPIARLAAAQ | VIV |
| Ec | FRVPIARLAAAQ | VLV |
| Sb | FRVPIARLAAAQ | VLV |
| Si | FRVPIARLAAAQ | VLV |
| So | FRVPIARLAAAQ | VLV |
| Zm | FRVPIARLAAAQ | VLV |
